# Supplementary material
Source: ML conference proceedings conference paper supplement (https://openreview.net/forum?id=aE2ZGYxrAe)
Supplement: supplementary_material [file attachment]

# Appendix

## Zenith: Real-time Identification of DASH Encrypted Video Traffic with Distortion

Anonymous Authors

### A COMPARISON DATA

We compare Zenith with four other SOTA methods across various complex network environments and playback modes, and Zenith

significantly improves both accuracy and speed. Table 1 presents the accuracy of encrypted video traffic identification for Zenith and four other SOTA methods across five different scenarios.

Table 1: Detailed data from the method comparison experiment.

| Method | Video Duration (s) | Accuracy (%) |       |                |       |                 |       |       |       |               |       | Average Time Consumption (ms) |
|--------|--------------------|--------------|-------|----------------|-------|-----------------|-------|-------|-------|---------------|-------|-------------------------------|
|        |                    | Ideal        |       | Low Resolution |       | Auto Resolution |       | VPN   |       | Low Bandwidth |       |                               |
|        |                    | TLS          | QUIC  | TLS            | QUIC  | TLS             | QUIC  | TLS   | QUIC  | TLS           | QUIC  |                               |
| Wu     | 10                 | 62.41        | 55.34 | 59.31          | 57.76 | 60.90           | 51.77 | 62.06 | 54.34 | 55.11         | 51.93 | 63.25                         |
|        | 30                 | 80.97        | 65.29 | 77.09          | 65.22 | 78.50           | 67.32 | 79.29 | 67.07 | 74.00         | 62.65 |                               |
|        | 60                 | 87.14        | 74.30 | 84.34          | 72.32 | 83.64           | 71.61 | 84.16 | 73.76 | 79.99         | 68.92 |                               |
|        | 120                | 92.87        | 80.79 | 89.48          | 77.00 | 87.21           | 75.49 | 88.42 | 77.01 | 84.30         | 73.05 |                               |
|        | 240                | 96.01        | 84.22 | 95.67          | 83.97 | 91.37           | 79.34 | 92.87 | 81.43 | 88.89         | 77.11 |                               |
|        | 480                | 98.15        | 87.61 | 98.02          | 87.24 | 93.59           | 81.97 | 95.13 | 84.05 | 92.10         | 80.94 |                               |
| Yang   | 10                 | 60.88        | 53.47 | 57.19          | 54.23 | 55.89           | 52.39 | 56.97 | 53.41 | 51.16         | 45.36 | 71.89                         |
|        | 30                 | 83.41        | 68.19 | 79.26          | 65.51 | 75.33           | 60.22 | 76.93 | 61.30 | 69.22         | 58.44 |                               |
|        | 60                 | 88.27        | 75.53 | 85.13          | 73.00 | 80.29           | 67.87 | 81.03 | 68.29 | 75.98         | 64.30 |                               |
|        | 120                | 93.08        | 82.16 | 92.67          | 81.79 | 87.03           | 76.01 | 88.16 | 77.01 | 86.33         | 73.96 |                               |
|        | 240                | 97.89        | 85.11 | 97.16          | 84.30 | 91.78           | 79.13 | 92.04 | 79.86 | 90.21         | 76.10 |                               |
|        | 480                | 98.32        | 85.88 | 98.09          | 85.21 | 93.12           | 80.11 | 93.84 | 81.03 | 91.71         | 78.81 |                               |
| Zhang  | 10                 | 73.47        | 62.15 | 68.84          | 56.40 | 65.93           | 54.30 | 66.72 | 55.14 | 63.44         | 53.90 | $5.03 \times 10^{-1}$         |
|        | 30                 | 92.03        | 81.97 | 89.26          | 77.71 | 88.09           | 75.72 | 88.97 | 77.23 | 85.14         | 75.21 |                               |
|        | 60                 | 95.42        | 85.13 | 93.70          | 81.83 | 91.54           | 80.01 | 92.60 | 80.90 | 88.73         | 78.36 |                               |
|        | 120                | 97.11        | 85.89 | 95.98          | 85.07 | 94.33           | 84.20 | 95.79 | 85.11 | 93.87         | 83.25 |                               |
|        | 240                | 98.39        | 87.55 | 97.55          | 86.28 | 95.99           | 85.49 | 96.20 | 85.97 | 95.01         | 83.92 |                               |
|        | 480                | 98.76        | 88.12 | 98.42          | 87.98 | 96.13           | 85.85 | 96.87 | 86.19 | 95.26         | 84.78 |                               |
| Bae    | 10                 | 60.39        | 59.22 | 57.98          | 58.94 | 55.61           | 53.77 | 59.17 | 58.56 | 54.30         | 53.88 | 119.62                        |
|        | 30                 | 95.88        | 95.30 | 88.49          | 87.21 | 83.12           | 83.57 | 85.99 | 86.13 | 80.22         | 79.37 |                               |
|        | 60                 | 96.31        | 96.26 | 93.38          | 93.66 | 86.40           | 87.78 | 90.37 | 91.02 | 84.05         | 83.98 |                               |
|        | 120                | 98.44        | 98.55 | 97.10          | 96.89 | 89.77           | 89.30 | 93.64 | 92.23 | 87.29         | 88.02 |                               |
|        | 240                | 99.10        | 99.13 | 98.73          | 98.78 | 92.71           | 92.16 | 95.49 | 94.67 | 90.55         | 89.98 |                               |
|        | 480                | 99.98        | 99.98 | 99.98          | 99.98 | 94.33           | 93.74 | 97.64 | 95.88 | 92.41         | 93.65 |                               |
| Zenith | 10                 | 80.11        | 78.66 | 72.31          | 68.17 | 77.99           | 75.30 | 78.12 | 77.93 | 63.19         | 60.94 | $9.87 \times 10^{-3}$         |
|        | 30                 | 97.32        | 97.10 | 95.22          | 94.87 | 95.79           | 95.60 | 95.81 | 95.44 | 93.72         | 93.11 |                               |
|        | 60                 | 97.79        | 97.61 | 96.13          | 95.74 | 96.72           | 96.43 | 96.70 | 96.23 | 95.11         | 94.98 |                               |
|        | 120                | 98.53        | 98.30 | 98.11          | 98.02 | 97.69           | 97.56 | 97.83 | 97.75 | 96.99         | 96.77 |                               |
|        | 240                | 99.84        | 99.82 | 99.64          | 99.59 | 98.73           | 98.41 | 98.94 | 98.88 | 98.34         | 98.11 |                               |
|        | 480                | 99.98        | 99.98 | 99.98          | 99.98 | 99.87           | 99.54 | 99.88 | 99.73 | 99.42         | 99.33 |                               |
